# Supplementary material for: The halogen bond made visible: experimental charge density of a very short intermolecular Cl⋯Cl donor–acceptor contact
Source: Royal Society of Chemistry journal article supplement (doi:10.1039/c2cc32647g), 2012-01-01
Supplement: c2cc32647g.pdf [file c2cc32647g.pdf]

**Electronic Supplementary Information** for the Manuscript

**The halogen bond made visible: Experimental charge density of a very short intermolecular Cl $\cdots$ Cl donor-acceptor contact.**

Ruimin Wang, Thomas Dols, Christian W. Lehmann, and Ulli Englert

Institute of Inorganic Chemistry, RWTH Aachen University, Germany, and  
Max-Planck-Institut für Kohlenforschung, Mülheim, Germany

## Synthesis:

Chemicals and reagents: Zincchloride and 3,4,5-trichloropyridine and 3-chloro-pyridine were purchased and used without further purification.

### Preparation and Crystallization of **1**

Crystals were directly obtained by reactant diffusion: 0.25 mmol (34 mg)  $\text{ZnCl}_2$  were dissolved in 5 mL of ethanol and placed in a test tube. 3 mL of EtOH were layer above, and a third layer of 0.5 mmol (91 mg) of trichloropyridine was added. Colourless crystals formed after 3 days. Microanalysis for the solid: C 23.64, H 0.59, N 5.52 %; theoretical for  $\text{C}_{10}\text{H}_4\text{N}_2\text{Cl}_8\text{Zn}$ : C 23.97, H 0.80, N 5.59%.

### Preparation of **2**

10 mmol (1.36 g) of  $\text{ZnCl}_2$  and 20 mmol (2.27 g) of 3-chloropyridine were dissolved separately, each in 20 mL of ethanol; the two solutions were mixed and stirred at room temperature. After 20 min, the off-white precipitate was filtered and dried in vacuo. Yield 2.55 g, 70%.

### Crystallization of **2**

An excess of **2** was suspended at 50° C in isopropanol; the hot suspension was filtered and the clear filtrate was slowly cooled to room temperature in a warm oil bath. Crystals formed after 15 hrs. Microanalysis for the solid: C 32.86, H 2.19, N 7.80 %; theoretical for  $\text{C}_{10}\text{H}_8\text{N}_2\text{Cl}_4\text{Zn}$ : C 33.05, H 2.22, N 7.71 %.

## Crystallographic studies:

### X-ray data collection

Intensity data for **1** were collected at 100 K on a Bruker AXS Mach3 goniometer with Kappa CCD detector. X-rays were generated by a rotating anode (Bruker AXS FR591) using Mo- $K\alpha$  radiation and a graphite monochromator. An Oxford Cryosystems 700 controller was used to ensure temperature stability during data collection.

Intensity data for **2** were collected at 100 K on a Bruker D8 goniometer equipped with an APEX CCD detector using Mo  $K\alpha$  radiation ( $\lambda = 0.71073 \text{ \AA}$ ). The radiation source was an

INCOATEC I- $\mu$ S microsource equipped with multilayer optics. An Oxford Cryosystems 700 controller was used to ensure temperature stability during data collection.

For both data sets the SAINT software [1] was used for integration. Data were merged with the program SHELXL97.[2] Crystal data and information concerning data collection is compiled in Table S1.

### **Spherical-atom refinement and multipole refinement**

The structures were solved with direct methods and the independent atom refinement was performed by full-matrix least squares on  $F^2$ . [2] Anisotropic displacement parameters were assigned to non-H atoms. Coordinates and isotropic displacement parameters of the only H atom in the asymmetric unit of **1** were refined, whereas the hydrogen atoms in **2** were included in idealized geometry.

The multipolar refinement was based on the independent atom model as starting geometry. It was carried out on  $F^2$  according to the Hansen & Coppens formalism for aspherical atomic density expansion[3] as implemented in *XD2006*. [4] The VM databank was adopted for the refinement. For the metal center, the 12 electrons of  $3d^{10}4s^2$  were regarded to populate the valence shell with the initial valence state of +2. Multipole coefficients up to hexadecapoles were refined for non-H atoms. For H atoms, positions were constrained to C-H bond distances of 1.083 Å and monopoles and bond-oriented dipoles were considered in the multipolar refinements. In all refinements the multipoles were introduced stepwise until a full hexadecapole expansion was reached. Convergence results and details about the treatment of contraction parameters have been compiled in Table S2.

**1** and **2** are transition metal compounds with suitability factors [5] of 0.35 and 0.43, respectively. Residual densities after the multipole refinement are smaller than after the spherical-atom refinement but still higher than usually encountered for organic compounds; the most prominent maxima and minima are located in the neighborhood of the zinc centers.

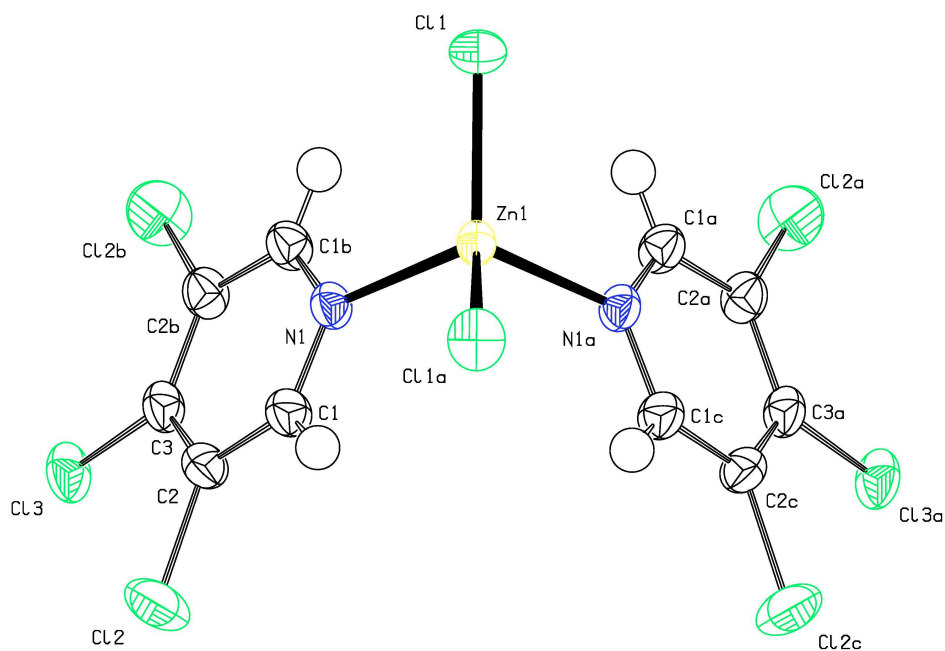

**Figure S1.** Displacement ellipsoid plots [6] of a complex molecule in **1**, drawn at the 90% probability level. Symmetry operations: a = 1-x, 1-y, z; b = 1-y, 1-x, z; c = y, x, z.

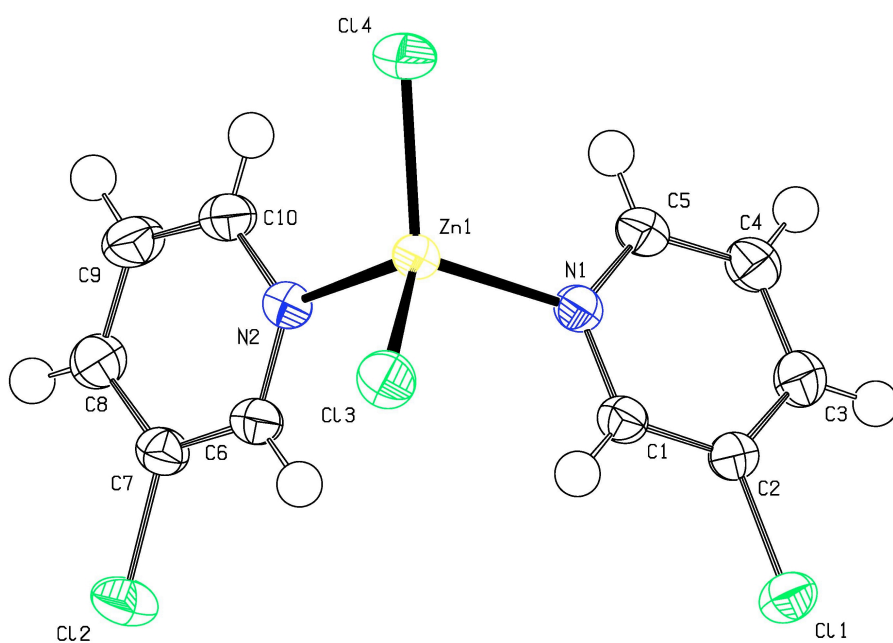

**Figure S2.** Displacement ellipsoid plots [6] of a complex molecule in **2**, drawn at the 90% probability level.

**Table S1** Crystal data and data collection parameters

|                                                              | 1                                                                | 2                                                                |
|--------------------------------------------------------------|------------------------------------------------------------------|------------------------------------------------------------------|
| Chemical formula                                             | C <sub>10</sub> H <sub>4</sub> Cl <sub>8</sub> N <sub>2</sub> Zn | C <sub>10</sub> H <sub>8</sub> Cl <sub>4</sub> N <sub>2</sub> Zn |
| $M_r$                                                        | 501.12                                                           | 363.35                                                           |
| Crystal system, space group                                  | Tetragonal, $P4_2nm$                                             | Triclinic, $P-1$                                                 |
| Temperature (K)                                              | 100                                                              | 100                                                              |
| $a, b, c$ (Å)                                                | 12.4404(3), 12.4404(3), 5.2602(3)                                | 7.2699(10), 7.8257(11), 13.110(2)                                |
| $\alpha, \beta, \gamma$ (deg)                                |                                                                  | 84.204(6), 89.280(6), 62.377(5)                                  |
| $V$ (Å <sup>3</sup> )                                        | 814.09(5)                                                        | 656.97(17)                                                       |
| $Z$                                                          | 2                                                                | 2                                                                |
| Radiation type                                               | Mo $K\alpha$                                                     | Mo $K\alpha$                                                     |
| $\mu$ (mm <sup>-1</sup> )                                    | 2.811                                                            | 2.658                                                            |
| Crystal form, size (mm)                                      | Needle, 0.34*0.05*0.03                                           | Prism, 0.29*0.26*0.25                                            |
| Data collection                                              |                                                                  |                                                                  |
| Diffractometer                                               | Bruker Kappa CCD<br>diffractometer (rotating anode)              | Bruker <i>APEX</i> CCD<br>diffractometer                         |
| Data-collection method                                       | $\omega$ scans                                                   | $\omega$ scans                                                   |
| Absorption correction                                        | Multi-scan <i>SADABS</i>                                         | Multi-scan <i>SADABS</i>                                         |
| $T_{\min}, T_{\max}$                                         | 0.448, 0.920                                                     | 0.513, 0.556                                                     |
| $(\sin \theta/\lambda)_{\max}$ (Å <sup>-1</sup> )            | 1.155                                                            | 1.148                                                            |
| No. of measured,<br>independent, and observed<br>reflections | 81346, 5405, 5096                                                | 61942, 15656, 12077                                              |
| Criterion for observed<br>reflections                        | $I > 2\sigma(I)$                                                 | $I > 2\sigma(I)$                                                 |
| $R_{\text{int}}$                                             | 0.0426                                                           | 0.0487                                                           |
| $\theta_{\max}$ (°)                                          | 55.21                                                            | 54.71                                                            |

**Table S2** Refinement results on IAM and multipole model

|                                                                        | <b>1</b>                                        | <b>2</b>                                                       |
|------------------------------------------------------------------------|-------------------------------------------------|----------------------------------------------------------------|
| <b>IAM model</b>                                                       |                                                 |                                                                |
| Function minimized                                                     | $F^2$                                           | $F^2$                                                          |
| $R1$ (obs)                                                             | 0.0268                                          | 0.0271                                                         |
| $R1$ (all)                                                             | 0.0303                                          | 0.0363                                                         |
| $wR2$                                                                  | 0.0690                                          | 0.0587                                                         |
| $a, b$ in weighting                                                    |                                                 |                                                                |
| scheme                                                                 | 0.02, 0.42                                      | 0.02                                                           |
| $S$                                                                    | 1.051                                           | 1.012                                                          |
| $\Delta\rho_{\max}, \Delta\rho_{\min}$ ( $\text{e } \text{\AA}^{-3}$ ) | 1.063, -0.744                                   | 1.203, -1.090                                                  |
| No. of reflections                                                     | 5405                                            | 15656                                                          |
| No. of parameters                                                      | 60                                              | 154                                                            |
| Flack parameter                                                        | 0.130(6)                                        |                                                                |
| <b>Multipole model</b>                                                 |                                                 |                                                                |
| Function minimized                                                     | $F^2$                                           | $F^2$                                                          |
| $R1$ (obs)                                                             | 0.025                                           | 0.022                                                          |
| $R1$ (all)                                                             | 0.031                                           | 0.034                                                          |
| $R2, wR2$                                                              | 0.035, 0.075                                    | 0.038, 0.037                                                   |
| $S$                                                                    | 1.1399                                          | 0.945                                                          |
| $\Delta\rho_{\max}, \Delta\rho_{\min}$ ( $\text{e } \text{\AA}^{-3}$ ) | 0.925, -0.584                                   | 0.680, -0.803                                                  |
| Contraction                                                            |                                                 |                                                                |
| parameters                                                             |                                                 |                                                                |
| $\kappa$                                                               | refined for non H atoms; fixed to<br>1.13 for H | refined for non H atoms; fixed to<br>1.13 for H                |
| $\kappa'$                                                              | fixed to 1.2 for Zn, Cl, H<br>refined for N, C  | fixed to 1.0 for Cl, 1.2 for H<br>refined for other atom types |

# Data quality and completeness for intensity data of **1**

Plot of ratio  $K$  vs  $\sin\theta/\lambda$ ;  $K$  is the ratio  $F^2_{\text{obs}}/F^2_{\text{calc}}$

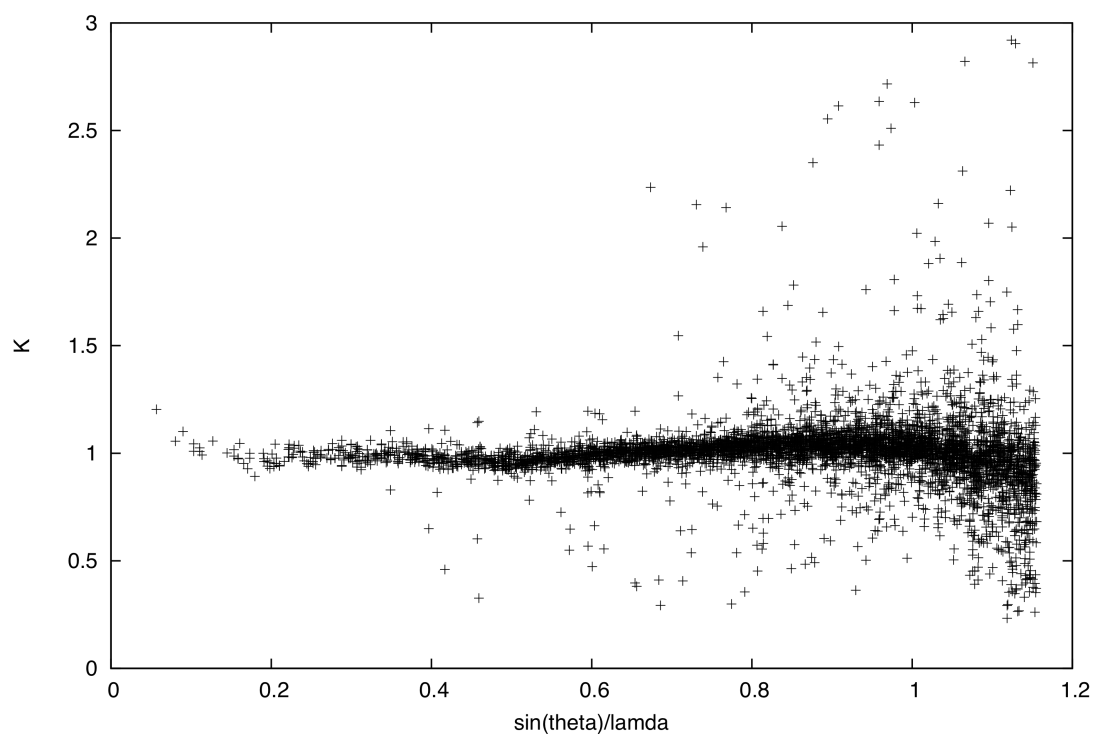

## Summary of completeness for the experimental charge density data (Friedel pairs merged!)

| $\theta$                  | $\sin(\theta_{\text{max}})/\lambda$ | Complete | *Expected | *Measured | *Missing | *cumulative |
|---------------------------|-------------------------------------|----------|-----------|-----------|----------|-------------|
| 20.82                     | 0.500                               | 0.993    | 268       | 266       | 2        |             |
| 23.01                     | 0.550                               | 0.994    | 344       | 342       | 2        |             |
| 25.24                     | 0.600                               | 0.995    | 443       | 441       | 2        |             |
| ----- ACTA Min. Res. ---- |                                     |          |           |           |          |             |
| 27.51                     | 0.650                               | 0.996    | 551       | 549       | 2        |             |
| 29.84                     | 0.700                               | 0.997    | 686       | 684       | 2        |             |
| 32.21                     | 0.750                               | 0.998    | 836       | 834       | 2        |             |
| 34.65                     | 0.800                               | 0.998    | 1002      | 1000      | 2        |             |
| 37.17                     | 0.850                               | 0.998    | 1188      | 1186      | 2        |             |
| 39.77                     | 0.900                               | 0.999    | 1406      | 1404      | 2        |             |
| 42.47                     | 0.950                               | 0.999    | 1636      | 1634      | 2        |             |
| 45.29                     | 1.000                               | 0.999    | 1905      | 1903      | 2        |             |
| 48.27                     | 1.050                               | 0.999    | 2190      | 2188      | 2        |             |
| 51.43                     | 1.100                               | 0.999    | 2513      | 2511      | 2        |             |
| 54.82                     | 1.150                               | 0.999    | 2853      | 2851      | 2        |             |
| 55.21                     | 1.156                               | 0.997    | 2904      | 2895      | 9        |             |

Summary of completeness for the experimental charge density data (Friedel pairs unmerged!)

overall SMAX =  $\sin(\theta_{\max})/\lambda = 1.156 \text{ \AA}^{-1}$

overall DMIN =  $1/(2*\sin(\theta_{\max})/\lambda) = 0.43 \text{ \AA}$

N = 5682 MEASURED UNIQUE HKL

M = 74 MISSING UNIQUE HKL WITH  $\sin(\theta_{\max})/\lambda < \text{SMAX}$

overall completeness = 98.7%

# DISTRIBUTION OF MEASURED AND MISSING REFLECTIONS IN EQUAL-VOLUME RESOLUTION SHELLS

| SHELL<br>SMAX | SHELL<br>DMIN | NHKL<br>MEASURED | NHKL<br>MISSING | PERCENT<br>COMPLETENESS |
|---------------|---------------|------------------|-----------------|-------------------------|
| 0.4257        | 1.175         | 324              | 9               | 97.3                    |
| 0.5363        | 0.932         | 300              | 1               | 99.7                    |
| 0.6140        | 0.814         | 287              | 5               | 98.3                    |
| 0.6758        | 0.740         | 280              | 7               | 97.6                    |
| 0.7279        | 0.687         | 294              | 5               | 98.3                    |
| 0.7736        | 0.646         | 271              | 5               | 98.2                    |
| 0.8143        | 0.614         | 294              | 5               | 98.3                    |
| 0.8514        | 0.587         | 269              | 2               | 99.3                    |
| 0.8855        | 0.565         | 283              | 4               | 98.6                    |
| 0.9171        | 0.545         | 287              | 2               | 99.3                    |
| 0.9468        | 0.528         | 273              | 2               | 99.3                    |
| 0.9746        | 0.513         | 287              | 2               | 99.3                    |
| 1.0010        | 0.500         | 280              | 0               | 100.0                   |
| 1.0260        | 0.487         | 291              | 2               | 99.3                    |
| 1.0499        | 0.476         | 261              | 1               | 99.6                    |
| 1.0727        | 0.466         | 283              | 1               | 99.6                    |
| 1.0946        | 0.457         | 283              | 0               | 100.0                   |
| 1.1157        | 0.448         | 284              | 0               | 100.0                   |
| 1.1359        | 0.440         | 267              | 1               | 99.6                    |
| 1.1555        | 0.433         | 284              | 21              | 93.1                    |



Data quality and completeness for intensity data of **2**

Plot of ratio  $K$  vs  $\sin\theta/\lambda$ ;  $K$  is the ratio  $F^2_{\text{obs}}/F^2_{\text{calc}}$

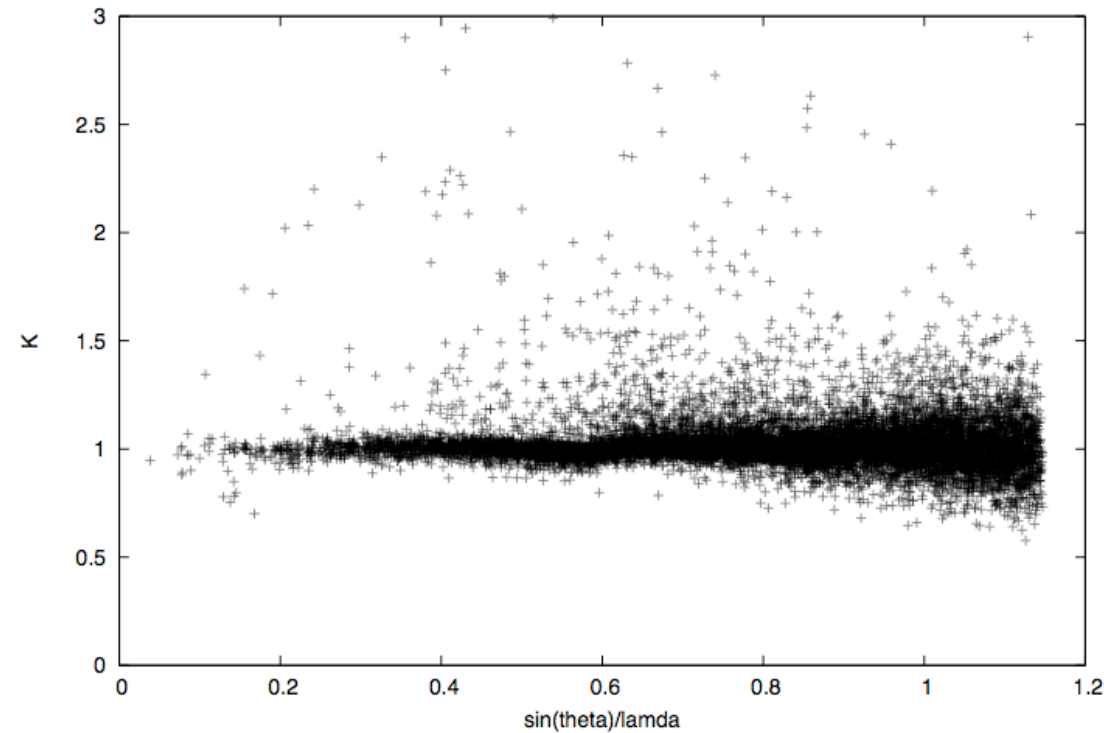

Summary of completeness for the experimental charge density data

| $\theta$                 | $\sin(\theta_{\text{max}})/\lambda$ | Complete | *Expected | *Measured | *Missing | *cumulative |
|--------------------------|-------------------------------------|----------|-----------|-----------|----------|-------------|
| 20.82                    | 0.500                               | 1.000    | 1369      | 1369      | 0        |             |
| 23.01                    | 0.550                               | 1.000    | 1833      | 1833      | 0        |             |
| 25.24                    | 0.600                               | 1.000    | 2389      | 2389      | 0        |             |
| ----- ACTA Min. Res. --- |                                     |          |           |           |          |             |
| 27.51                    | 0.650                               | 1.000    | 3022      | 3022      | 0        |             |
| 29.84                    | 0.700                               | 0.999    | 3760      | 3756      | 4        |             |
| 32.21                    | 0.750                               | 0.998    | 4635      | 4625      | 10       |             |
| 34.65                    | 0.800                               | 0.996    | 5656      | 5633      | 23       |             |
| 37.17                    | 0.850                               | 0.994    | 6755      | 6712      | 43       |             |
| 39.77                    | 0.900                               | 0.991    | 8003      | 7933      | 70       |             |
| 42.47                    | 0.950                               | 0.988    | 9434      | 9317      | 117      |             |
| 45.29                    | 1.000                               | 0.983    | 11014     | 10830     | 184      |             |
| 48.27                    | 1.050                               | 0.975    | 12755     | 12432     | 323      |             |
| 51.43                    | 1.100                               | 0.964    | 14631     | 14110     | 521      |             |
| 54.71                    | 1.148                               | 0.940    | 16656     | 15656     | 1000     |             |

**Table S3.** Topological properties for bond critical points in **1**; dist is the interatomic distance,  $d_{ij}$  the total bond path  $d_1 + d_2$ ,  $d_1$  and  $d_2$  the distances from the bond critical point to the 1<sup>st</sup> and 2<sup>nd</sup> atom along the bond path;  $\rho$  and  $\nabla^2\rho$  represent the electron density and its Laplacian at the bond critical point. Note the large discrepancy between the interatomic distance  $H(1) \cdots Cl(3)^b$  and the bond path due to the pronounced curvature of the latter.

| Bond                       | dist (Å)   | $d_{ij}$ (Å) | $d_1$ (Å) | $d_2$ (Å) | $\rho$ (eÅ <sup>-3</sup> ) | $\nabla^2$ (eÅ <sup>-5</sup> ) |
|----------------------------|------------|--------------|-----------|-----------|----------------------------|--------------------------------|
| Cl(1)···Cl(3) <sup>a</sup> | 3.1912(6)  | 3.1912       | 1.5779    | 1.6133    | 0.107(2)                   | 1.102(4)                       |
| H(1) ···Cl(3) <sup>b</sup> | 2.84       | 3.0412       | 1.2529    | 1.7882    | 0.054(6)                   | 0.424(3)                       |
| Zn(1)–Cl(1)                | 2.2048(3)  | 2.2051       | 1.0161    | 1.1890    | 0.47(2)                    | 5.03(2)                        |
| Zn(1)–N(1)                 | 2.0764(8)  | 2.0798       | 1.0320    | 1.0478    | 0.38(2)                    | 7.12(3)                        |
| Cl(2)–C(2)                 | 1.7113(7)  | 1.7118       | 0.9425    | 0.7694    | 1.41(8)                    | –7.1(2)                        |
| Cl(3)–C(3)                 | 1.7014(9)  | 1.7144       | 1.0042    | 0.7102    | 1.53(5)                    | –13.1(2)                       |
| N(1)–C(1)                  | 1.3379(8)  | 1.3437       | 0.8686    | 0.4752    | 2.41(7)                    | –36.7(3)                       |
| C(3)–C(2)                  | 1.3980(8)  | 1.3984       | 0.7366    | 0.6618    | 2.31(6)                    | –27.3(2)                       |
| C(2)–C(1)                  | 1.3882(10) | 1.3900       | 0.6755    | 0.7146    | 2.16(6)                    | –28.4(2)                       |
| C(1)–H(1)                  | 1.083      | 1.0850       | 0.6618    | 0.4232    | 1.7(2)                     | –13.9(4)                       |

a= 3/2–y, 1/2+x, 3/2+z

b= –1/2+y, 1/2–x, 1/2+z

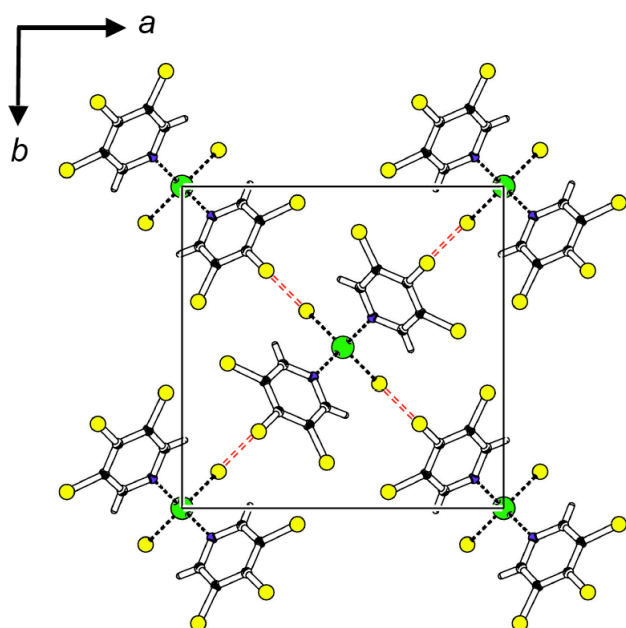

**Figure S3.** Packing diagram [6] for **1**; the short Cl...Cl contacts are shown as dashed red lines.

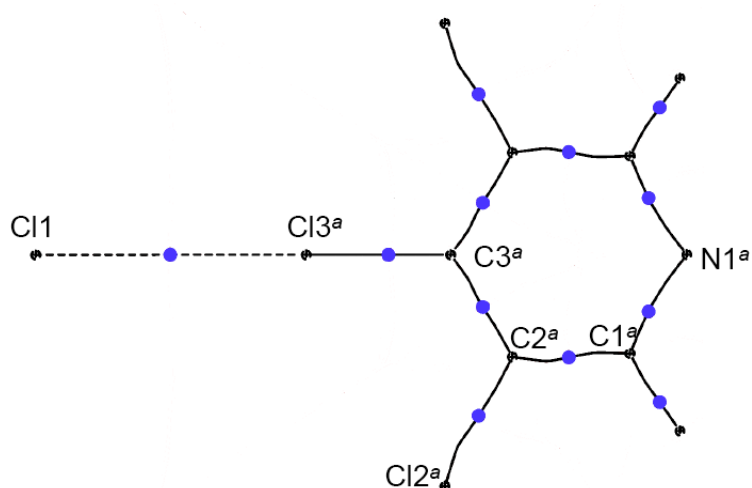

**Figure S4.** Molecular graph [4] around the short Cl...Cl contacts in **1**; nuclear attractors and bond paths are shown in black (Cl...Cl dashed), bond critical points in blue.

**Table S4.** Topological properties for bond critical points in **2**; dist is the interatomic distance,  $d_{ij}$  the total bond path  $d_1 + d_2$ ,  $d_1$  and  $d_2$  the distances from the bond critical point to the 1<sup>st</sup> and 2<sup>nd</sup> atom along the bond path;  $\rho$  and  $\nabla^2\rho$  represent the electron density and its Laplacian at the bond critical point.

| Bond                       | dist(Å)     | d <sub>ij</sub> (Å) | d <sub>1</sub> (Å) | d <sub>2</sub> (Å) | ρ(eÅ <sup>-3</sup> ) | ∇2(eÅ <sup>-5</sup> ) |
|----------------------------|-------------|---------------------|--------------------|--------------------|----------------------|-----------------------|
| Cl(1)···Cl(1) <sup>a</sup> | 3.3651(6)   | 3.3650              | 1.6825             | 1.6825             | 0.048(2)             | 0.576(2)              |
| Cl(2)···Cl(2) <sup>b</sup> | 3.5480(6)   | 3.5480              | 1.7738             | 1.7742             | 0.041(2)             | 0.489(2)              |
| Cl(1)···H(3) <sup>c</sup>  | 2.77        | 2.7684              | 1.7466             | 1.0218             | 0.046(7)             | 0.632(2)              |
| Cl(4)···H(10)              | 2.73        | 2.7416              | 1.6335             | 1.1081             | 0.080(3)             | 0.841(2)              |
| Zn(1)–Cl(3)                | 2.22445(14) | 2.2246              | 1.0359             | 1.1887             | 0.437(7)             | 6.855(4)              |
| Zn(1)–Cl(4)                | 2.21662(14) | 2.2171              | 1.0336             | 1.1835             | 0.387(7)             | 6.403(4)              |
| Zn(1)–N(1)                 | 2.0514(6)   | 2.0534              | 1.0011             | 1.0523             | 0.532(8)             | 8.89(2)               |
| Zn(1)–N(2)                 | 2.0831(6)   | 2.0834              | 1.0133             | 1.0701             | 0.509(8)             | 8.88(2)               |
| Cl(1)–C(2)                 | 1.7218(5)   | 1.7226              | 0.9784             | 0.7442             | 1.37(2)              | –4.20(5)              |
| Cl(2)–C(7)                 | 1.7199(5)   | 1.7208              | 0.9203             | 0.8004             | 1.20(2)              | –0.11(5)              |
| N(1)–C(1)                  | 1.3453(7)   | 1.3457              | 0.8255             | 0.5202             | 2.45(3)              | –27.6(2)              |
| N(1)–C(5)                  | 1.3475(6)   | 1.3495              | 0.7698             | 0.5797             | 2.29(3)              | –23.23(9)             |
| N(2)–C(6)                  | 1.3434(7)   | 1.3447              | 0.7945             | 0.5503             | 2.29(3)              | –21.9(2)              |
| N(2)–C(10)                 | 1.3443(7)   | 1.3443              | 0.8239             | 0.5205             | 2.53(3)              | –33.1(2)              |
| C(1)–C(2)                  | 1.3869(7)   | 1.3869              | 0.6878             | 0.6991             | 2.20(2)              | –21.95(6)             |
| C(1)–H(1)                  | 1.083       | 1.0833              | 0.7797             | 0.3036             | 1.72(4)              | –18.3(2)              |
| C(2)–C(3)                  | 1.3930(7)   | 1.3936              | 0.7824             | 0.6113             | 1.93(3)              | –17.05(8)             |
| C(3)–C(4)                  | 1.3898(8)   | 1.3897              | 0.6782             | 0.7115             | 2.07(2)              | –19.83(6)             |
| C(3)–H(3)                  | 1.083       | 1.0842              | 0.7629             | 0.3213             | 1.83(5)              | –19.9(2)              |
| C(4)–C(5)                  | 1.3886(7)   | 1.3893              | 0.7131             | 0.6762             | 2.17(2)              | –20.9(2)              |
| C(4)–H(4)                  | 1.083       | 1.0842              | 0.7595             | 0.3247             | 1.66(4)              | –15.3(2)              |
| C(5)–H(5)                  | 1.083       | 1.0858              | 0.7903             | 0.2955             | 1.70(5)              | –14.5(2)              |
| C(6)–C(7)                  | 1.3918(7)   | 1.3926              | 0.5976             | 0.7950             | 2.21(2)              | –21.72(9)             |
| C(6)–H(6)                  | 1.083       | 1.0834              | 0.7876             | 0.2958             | 1.79(5)              | –20.3(2)              |
| C(7)–C(8)                  | 1.3874(8)   | 1.3873              | 0.6707             | 0.7167             | 2.36(2)              | –25.39(6)             |
| C(8)–C(9)                  | 1.3890(8)   | 1.3892              | 0.7064             | 0.6828             | 2.17(2)              | –20.09(6)             |
| C(8)–H(8)                  | 1.083       | 1.0834              | 0.7896             | 0.2938             | 1.65(5)              | –16.2(3)              |
| C(9)–C(10)                 | 1.3887(8)   | 1.3894              | 0.7371             | 0.6524             | 2.23(2)              | –22.79(7)             |
| C(9)–H(9)                  | 1.083       | 1.0845              | 0.8056             | 0.2790             | 1.71(5)              | –19.4(3)              |
| C(10)–H(10)                | 1.083       | 1.0875              | 0.7819             | 0.3056             | 1.84(5)              | –19.0(2)              |
| a=–1–x,–y,1–z              |             |                     |                    |                    |                      |                       |
| b=–1–x,1–y,–z              |             |                     |                    |                    |                      |                       |
| c=–x,–1–y,1–z              |             |                     |                    |                    |                      |                       |

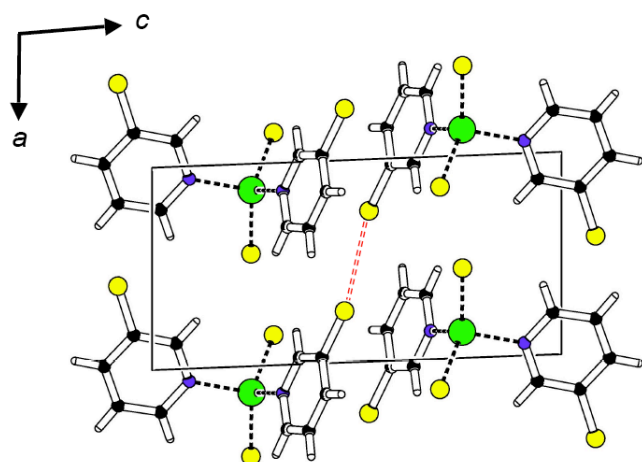

**Figure S5.** Packing diagram [6] for **2**; the short Cl...Cl contacts are shown as dashed red lines.

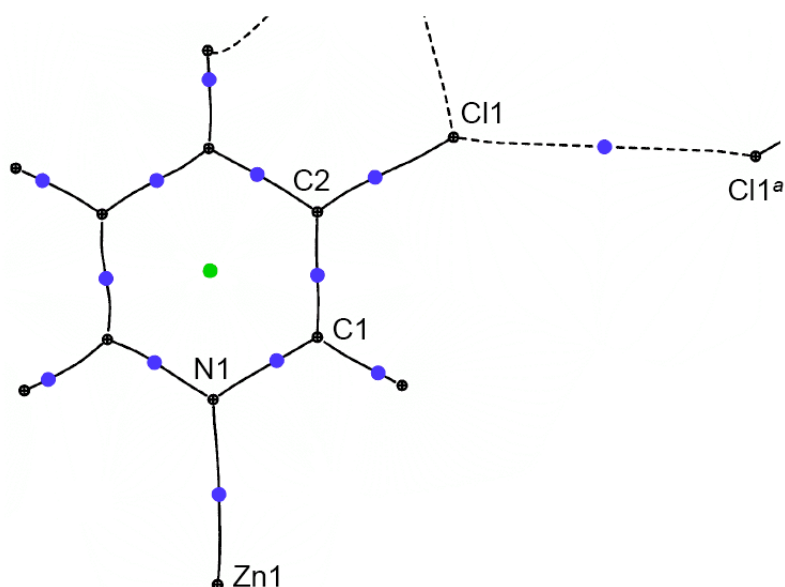

**Figure S6.** Molecular graph [4] around the short Cl...Cl contacts in **2**; nuclear attractors and bond paths are shown in black (Cl...Cl and hydrogen bonds dashed), bond critical points in blue, ring critical point in green.

## References:

1. Bruker SAINT, Version 6.45. Bruker AXS Inc., Madison, Wisconsin, USA, **2003**.
2. Sheldrick, G. M. *Acta Crystallogr. Sect A* **2008**, 64, 112.
3. Hansen, N. K. & Coppens, P. *Acta Crystallogr. Sect A* **1978**, 34, 909.
4. Volkov, A., Macchi, P., Farrugia, L. J., Gatti, C., Mallison, P. R., Richter, T. & Koritsanszky, T. XD2006, University of New York at Buffalo, USA, **2006**.
5. Coppens, P. *Isr. J. Chem.* **1977**, 16, 144–148.
6. Spek, A. L. *Acta Crystallogr. Sect. D*, **2009**, 65, 148.
